# Supplementary material
Source: PubMed Central journal article supplement (PMC4515947)

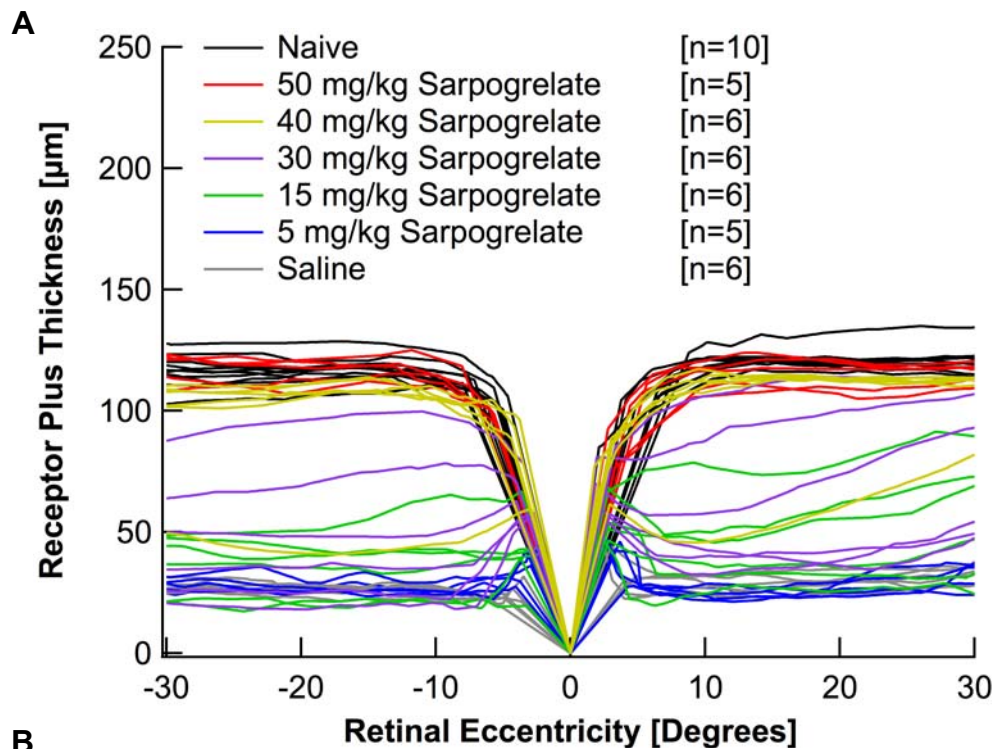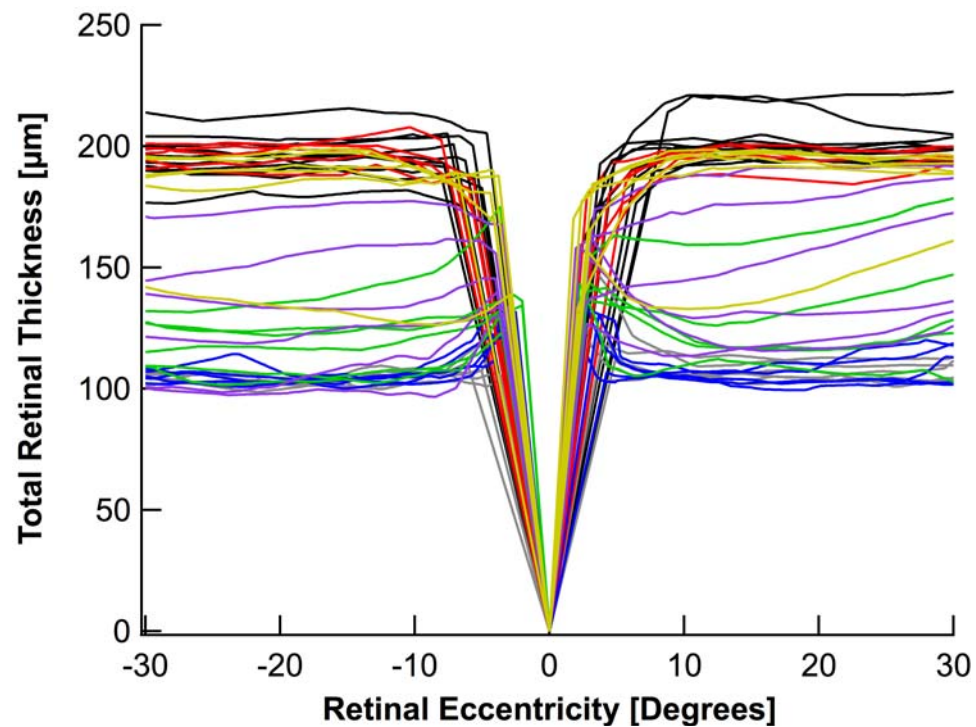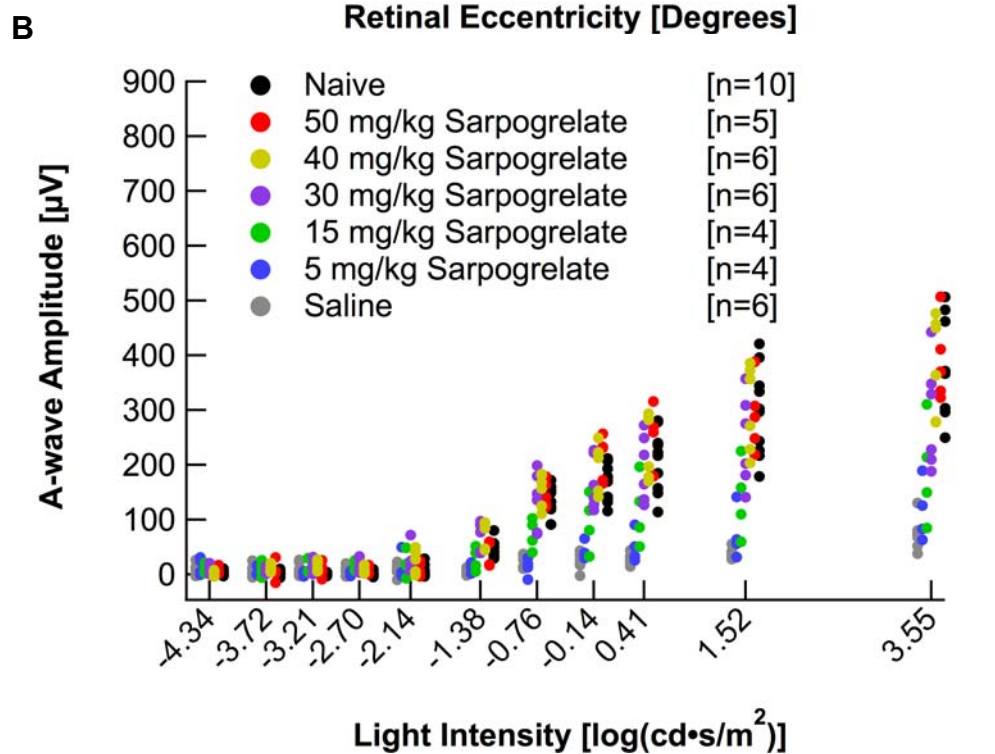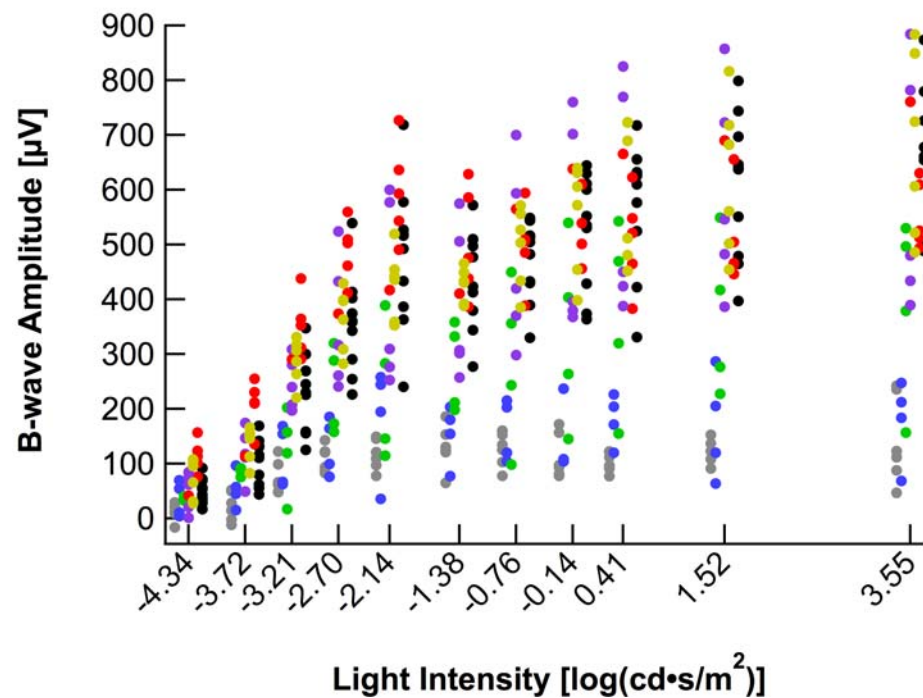

Light Intensity  
log (cd·s/m<sup>2</sup>)

Saline

5 mg/kg  
Sarpogrelate

50 mg/kg  
Sarpogrelate

Naive

-3.21

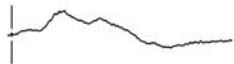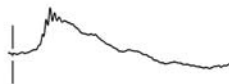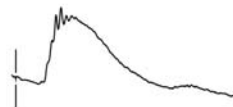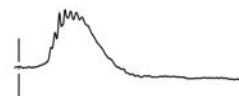

-2.14

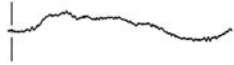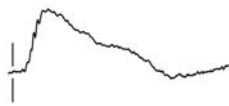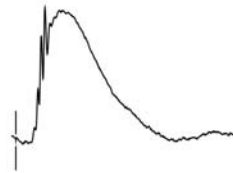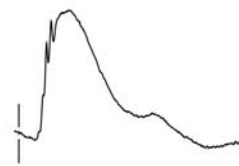

-1.38

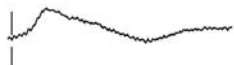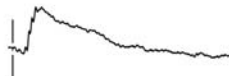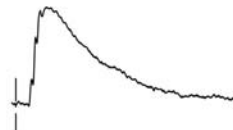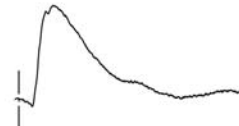

1.52

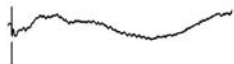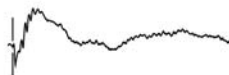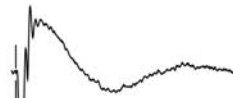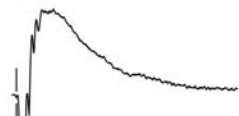

200 ms

500  $\mu$ V

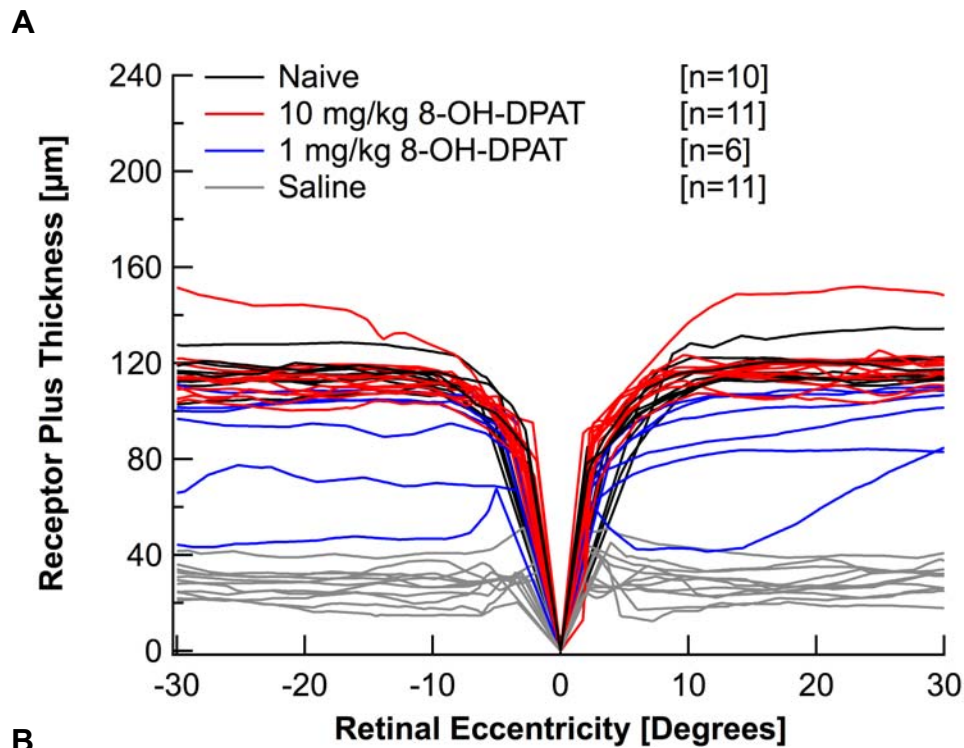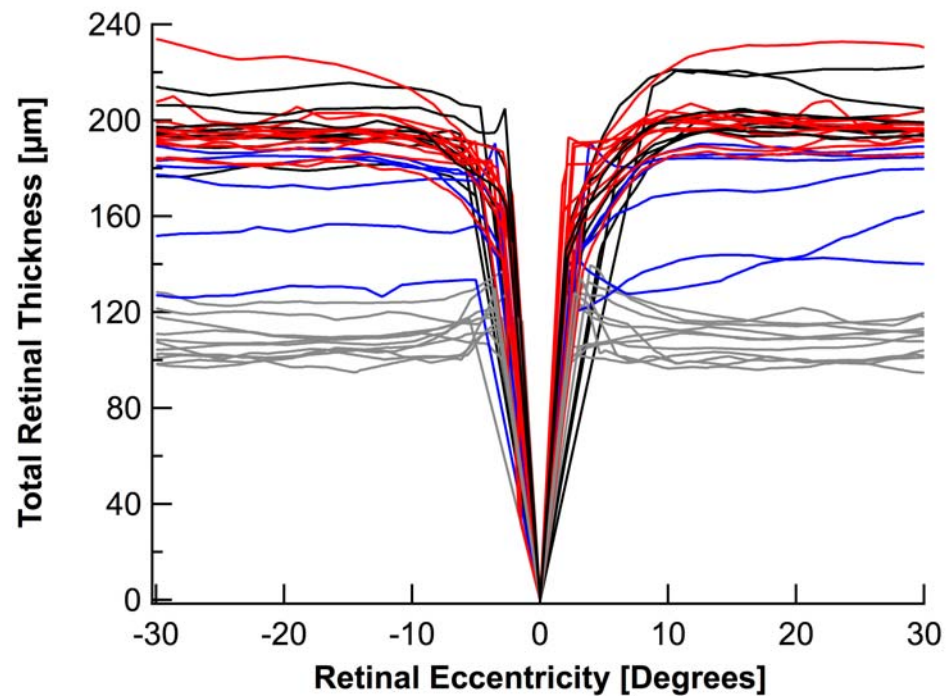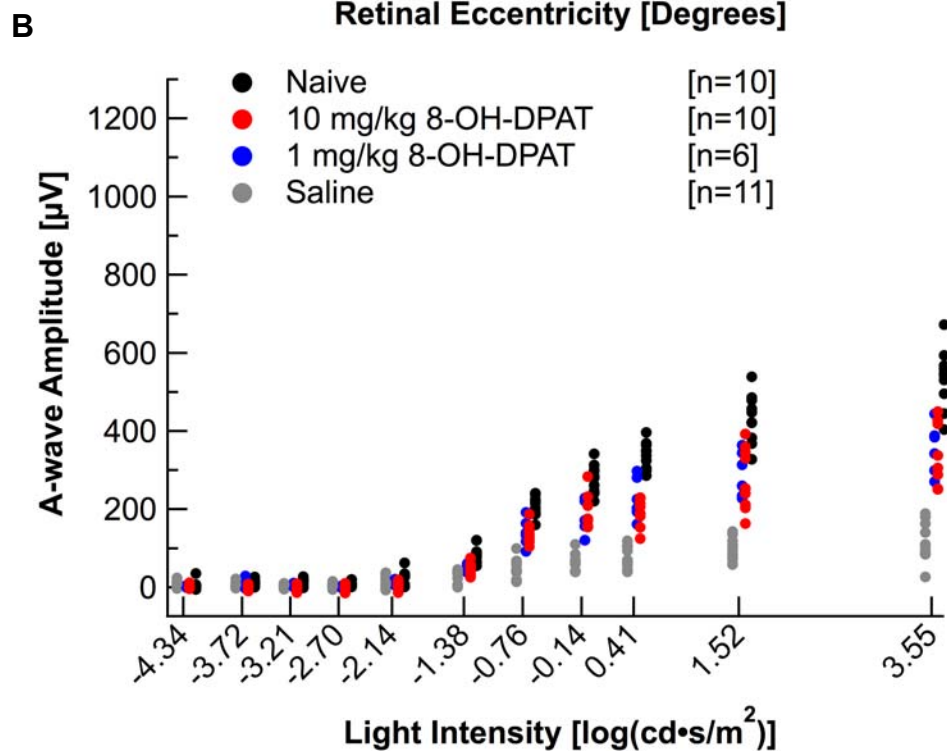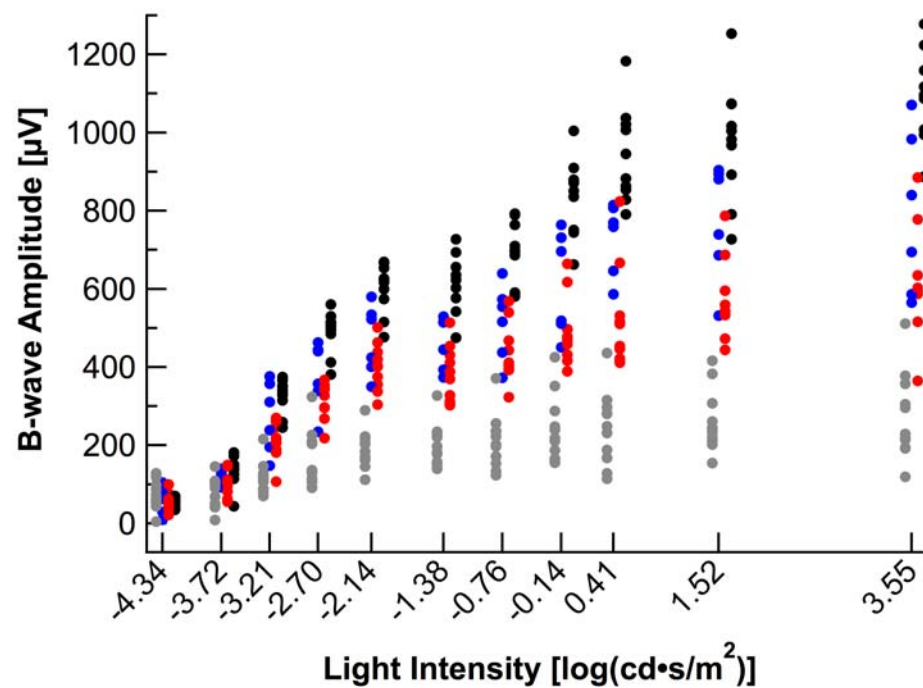

Supplement: i1552-5783-56-8-4560-s01.pdf [file i1552-5783-56-8-4560-s01.pdf]
